# Supplementary material for: Inflammatory and nutritional indexes as predictors of acute kidney injury in patients with Immunoglobulin A nephropathy: a retrospective study
Source: PeerJ. 2025 Aug 20;13:e19917. doi: 10.7717/peerj.19917 (PMC12374690; doi:10.7717/peerj.19917)
Supplement: Supplemental Information 11 [file peerj-13-19917-s011.xlsx]

## Sheet: Sheet1
Column Name	Variable Meaning	Variable Type	Coding Rules
No	Patient code	Numeric	A unique identification code assigned to each patient.
Gender	Gender	Categorical variable	1 - Male
			2 - Female
Age	Age	Numeric	The actual age recorded in years.
MAP	Mean arterial pressure	Numeric	The specifically measured blood pressure value (mmHg).
cigarette	Smoking status	Categorical variable	0 - Non - smoker
			1 - Smoker
alcohol	Drinking status	Categorical variable	0 - Non - drinker
			1 - Drinker
DM	Type 2 diabetes	Categorical variable	0 - No diabetes
			1 - With diabetes
WBC	White blood cell count	Numeric	The number of white blood cells per liter of blood (×10⁹/L).
NEO	Absolute neutrophil count	Numeric	The actual number of neutrophils per liter of blood (×10⁹/L).
LY	Lymphocyte - related index	Numeric	The absolute value of lymphocytes per liter of blood (×10⁹/L).
MO	Monocyte - related index	Numeric	The absolute value of monocytes per liter of blood (×10⁹/L).
HBG	Hemoglobin	Numeric	The content of hemoglobin per liter of blood (g/L).
PLT	Platelet count	Numeric	The number of platelets per liter of blood (×10⁹/L).
ChE	Cholinesterase	Numeric	The specifically measured cholinesterase activity value (U/L).
ALB	Serum albumin	Numeric	The content of albumin in the blood (g/L).
BUN	Blood urea nitrogen	Numeric	The content of urea nitrogen in the blood (mmol/L).
Cr	Serum creatinine	Numeric	The content of creatinine in the blood (μmol/L).
eGFR	Estimated glomerular filtration rate	Numeric	The estimated glomerular filtration rate (ml/min/1.73m²).
UA	Uric acid	Numeric	The content of uric acid in the blood (μmol/L).
TC	Total cholesterol	Numeric	The content of total cholesterol in the blood (mmol/L).
TG	Triglyceride	Numeric	The content of triglyceride in the blood (mmol/L).
HDL	High - density lipoprotein cholesterol	Numeric	The content of high - density lipoprotein cholesterol in the blood (mmol/L).
LDL	Low - density lipoprotein cholesterol	Numeric	The content of low - density lipoprotein cholesterol in the blood (mmol/L).
IgG	Immunoglobulin G	Numeric	The content of immunoglobulin G in the blood (g/L).
IgA	Immunoglobulin A	Numeric	The content of immunoglobulin A in the blood (g/L).
IgM	Immunoglobulin M	Numeric	The content of immunoglobulin M in the blood (g/L).
C3	Complement C3	Numeric	The content of complement C3 in the blood (g/L).
C4	Complement C4	Numeric	The content of complement C4 in the blood (g/L).
CRP	C - reactive protein	Numeric	The content of C - reactive protein in the blood (mg/L).
ASO	Anti - streptolysin O	Numeric	The specifically measured value (IU/ml).
URBC	Red blood cell count per high - power field	Numeric	The number of red blood cells per high - power field in the urine.
UPRO	24 hour urinary protein quantification	Numeric	The content of protein in the urine (g/24h).
UALB	Urinary micro - albumin	Numeric	The content of albumin in the urine (mg/L).
ANA	Antinuclear antibody	Categorical variable	0 - Negative
			1 - Positive
M	Mesangial hypercellularity (an index in the Oxford Classification System MEST - C)	Categorical variable	1 - It represents that the mesangial hypercellularity score > 0.5
			0 - It represents that the mesangial hypercellularity score M ≤ 0.5.
E	Endocapillary hypercellularity (an index in the Oxford Classification System MEST - C)	Categorical variable	1 - It represents the presence of endocapillary hypercellularity.
			0 - It represents the absence of endocapillary hypercellularity.
S	Segmental glomerulosclerosis (an index in the Oxford Classification System MEST - C)	Categorical variable	1 - It represents the presence of segmental sclerosis.
			0 - It represents the absence of segmental sclerosis.
TT	Interstitial fibrosis/tubular atrophy (an index in the Oxford Classification System MEST - C)	Categorical variable	2 - It represents that the proportion of tubular atrophy and interstitial fibrosis exceeds 50%.
			1 - It represents that the proportion of tubular atrophy and interstitial fibrosis is between 26% and 50%.
			0 - It represents that the proportion of tubular atrophy and interstitial fibrosis is ≤ 25%.
C	Cellular/fibrocellular crescents (an index in the Oxford Classification System MEST - C)	Categorical variable	2 - It represents that the proportion of glomeruli involved by crescents is ≥ 25%.
			1 - It represents that at least one glomerulus has a crescent, but the proportion of glomeruli involved by crescents is < 25%.
			0 - It represents the absence of crescents.
ESRDtime	Follow - up time for composite endpoint events	Numeric	The time (in months) from the starting observation point to the occurrence of the composite endpoint event.
END	Composite endpoint	Categorical variable	0 - Composite endpoint not reached
			1 - Composite endpoint reached
NS	Nephrotic syndrome	Categorical variable	0 - No nephrotic syndrome
			1 - With nephrotic syndrome
BMI	Body mass index	Numeric	The value obtained by dividing the weight (kg) by the square of the height (m).
SII	Systemic immune - inflammation index	Numeric	The specifically calculated index value.
SIRI	Systemic inflammation response index	Numeric	The specifically calculated index value.
PIV	Pan - immune inflammation value	Numeric	The specifically calculated value.
NLR	Neutrophil to lymphocyte ratio	Numeric	The value obtained by dividing the neutrophil count by the lymphocyte count.
LMR	Lymphocyte to monocyte ratio	Numeric	The value obtained by dividing the lymphocyte count by the monocyte count.
PLR	Platelet to lymphocyte ratio	Numeric	The value obtained by dividing the platelet count by the lymphocyte count.
NHR	Neutrophil to high - density lipoprotein cholesterol ratio	Numeric	The value obtained by dividing the neutrophil count by the high - density lipoprotein cholesterol content.
MHR	Monocyte to high - density lipoprotein cholesterol ratio	Numeric	The value obtained by dividing the monocyte count by the high - density lipoprotein cholesterol content.
LHR	Lymphocyte to high - density lipoprotein cholesterol ratio	Numeric	The value obtained by dividing the lymphocyte count by the high - density lipoprotein cholesterol content.
PHR	Platelet to high - density lipoprotein cholesterol ratio	Numeric	The value obtained by dividing the platelet count by the high - density lipoprotein cholesterol content.
LCR	Lymphocyte to C - reactive protein ratio	Numeric	The value obtained by dividing the lymphocyte count by the C - reactive protein content.
AKI	Acute kidney injury	Categorical variable	0 - No acute kidney injury
			1 - With acute kidney injury
Height	Height	Numeric	The height value recorded in centimeters.
Weight	Weight	Numeric	The weight value recorded in kilograms.
preACEIARB	Use of angiotensin - converting enzyme inhibitor/angiotensin II receptor blocker before renal biopsy	Categorical variable	0 - Not used
			1 - Used
preImmuneintervention	Use of hormones before renal biopsy	Categorical variable	0 - Not used
			1 - Used
DBP	Diastolic blood pressure	Numeric	The specifically measured diastolic blood pressure value (mmHg).
SBP	Systolic blood pressure	Numeric	The specifically measured systolic blood pressure value (mmHg).
Hypertension	Hypertension	Categorical variable	0 - No hypertension
			1 - With hypertension
end.eGFR	Final estimated glomerular filtration rate	Numeric	The final measured or estimated glomerular filtration rate (ml/min/1.73m²).
Decrease gt50 final blood creatinine	Final blood creatinine decreased by more than 50%	Categorical variable	0 - Not decreased by more than 50%
			1 - Decreased by more than 50%
Decrease gt50 final eGFR	Final estimated glomerular filtration rate decreased by more than 50%	Categorical variable	0 - Not decreased by more than 50%
			1 - Decreased by more than 50%
Decreased gt50 final time to renal puncture	Time from renal puncture to a more than 50% decrease in the final index	Numeric	Time (days/months, etc.).
BMI.group	BMI group	Categorical variable	Underweight (< 18.5) Normal (18.5 to 24.9) Overweight (25 to 29.9) Obese (≥ 30)
GNRI.1	Geriatric nutritional risk index	Numeric	The specifically calculated index value.
